# Supplementary material for: Investigating factors associated with success of breastfeeding in first-time mothers undergoing epidural analgesia: a prospective cohort study
Source: Int Breastfeed J. 2018 Sep 5;13:42. doi: 10.1186/s13006-018-0184-7 (PMC6125871; doi:10.1186/s13006-018-0184-7)
Supplement: Supplementary file 1 — Breastfeeding Questionnaire. This is a copy of the Breastfeeding Questionnaire which was conducted via a telephone interview to the participant at 5 to 9 weeks postpartum. (PDF 42 kb) [file 13006_2018_184_MOESM1_ESM.pdf]

## 12. Breastfeeding

Study ID \_\_\_\_\_

Is data collection completed?

☐ Yes ☐ No

If No, please specify the reason:

- ☐ Uncontactable  
☐ Declined Survey  
☐ Blank  
☐ Others

If Others, please specify the reason: \_\_\_\_\_

---

### Telephone follow-up at 5-9 weeks Postpartum

Date of Phone call:

\_\_\_\_\_  
((DD/MM/YYYY))

Phone call by:

- ☐ Kirsten Sim  
☐ Ng Jing Wen  
☐ Denise Anne  
☐ Wong Anng Anng  
☐ Yvonne Yong

1. Did you receive any of these support services on breastfeeding or giving breast milk to your baby? (may select more than 1 )

- ☐ Not at all  
☐ Help from ward nurses during my stay in hospital  
☐ Help from Lactation Consultant during my stay in hospital  
☐ Received a phone call from postnatal ward after discharge  
☐ Contacted the KKH Ask-a-Nurse Helpline  
☐ Contacted the KKH Lactation Consultant  
☐ Attended KKH Lactation Clinic  
☐ Attended KKH 24hrs O&G Clinic  
☐ Breastfeeding Mothers' Support Group Helpline  
☐ Joyful Parenting & Breastfeeding Helpline  
☐ Others

1.If others, pls specify: \_\_\_\_\_

2. Are you still breastfeeding or giving breast milk your baby?

☐ Yes (go to question 3 and 4) ☐ No (go to question 6 and 7)

3. How was breast milk fed to your baby in the last 24 hours? (may select more than 1)

- ☐ Direct breastfeeding  
☐ Expressed breast milk through bottle  
☐ Expressed breast milk through syringe/cup/spoon

4. What were you feeding your baby in the last 24 hours? (may select more than one answer):

☐ Breast milk ☐ Infant formula (Answer Q5) ☐ Water ☐ Solid food

5. If you are breastfeeding or giving breast milk partially to your baby, when you started with infant formula:

\_\_\_\_\_  
(DD-MM-YYYY)

Age in weeks:

\_\_\_\_\_  
(weeks ( note: Round up ))

Reasons for introducing infant formula (may select more than 1 answer):

- ☐ Fatigue/Tiredness
- ☐ Sore nipples
- ☐ Painful breast
- ☐ Insufficient milk supply
- ☐ Feeding difficulty (latching problem)
- ☐ Choose to partial breastfeed
- ☐ Returning to work after maternity leave
- ☐ No Breastfeeding facilities at workplace
- ☐ Encouraged by family members
- ☐ Encouraged by Confinement nanny
- ☐ Infant's Medical Reasons:
- ☐ Mother's Medical Reasons:
- ☐ Others, please specify

Pls specify, Infant's Medical Reasons:

---

Pls specify, Mother's Medical Reasons:

---

Others, please specify

---

6. If you have stopped either breastfeeding or giving breast milk to your baby when did you stop breastfeeding?

---

((DD/MM/YYYY))

7. Reasons for stopping breastfeeding (may select more than 1 answer):

- ☐ Fatigue/ Tiredness
- ☐ Sore nipples
- ☐ Painful breast
- ☐ Insufficient milk supply
- ☐ Feeding difficulty (latching problem)
- ☐ Choose to stop breastfeeding
- ☐ Return to work after maternity leave
- ☐ No Breastfeeding facilities at workplace
- ☐ Encouraged by family members
- ☐ Encouraged by confinement nanny
- ☐ Infant's Medical Reasons:
- ☐ Mother's Medical Reasons:
- ☐ Others:

Pls specify Infant's Medical Reasons:

---

Pls specify Mother's Medical Reasons:

---

Specify Others:

---
